# Supplementary material for: Tunable photocatalytic and photoelectric properties of I−-doped BiOBr photocatalyst: dramatic pH effect
Source: Royal Society of Chemistry journal article supplement (doi:10.1039/c5ra22943j), 2016-01-01
Supplement: c5ra22943j1.pdf [file c5ra22943j1.pdf]

## Supplementary Information

### Tunable photocatalytic and photoelectric properties of I-doped BiOBr photocatalyst: dramatic pH effect

Changjiang Bi<sup>a</sup>, Jing Cao<sup>a, b\*</sup>, Haili Lin<sup>a</sup>, Yunjian Wang<sup>a, \*\*</sup>, Shifu Chen<sup>a, c</sup>

<sup>a</sup> College of Chemistry and Materials Science, Huaibei Normal University, Huaibei, 235000, Anhui, PR China

<sup>b</sup> Anhui Collaborative Innovation Center of Advanced Functional Composite, Huaibei, 235000, Anhui, PR China

<sup>c</sup> College of Chemistry and Materials Engineering, Anhui Science and Technology University, Fengyang, 233100, Anhui, PR China

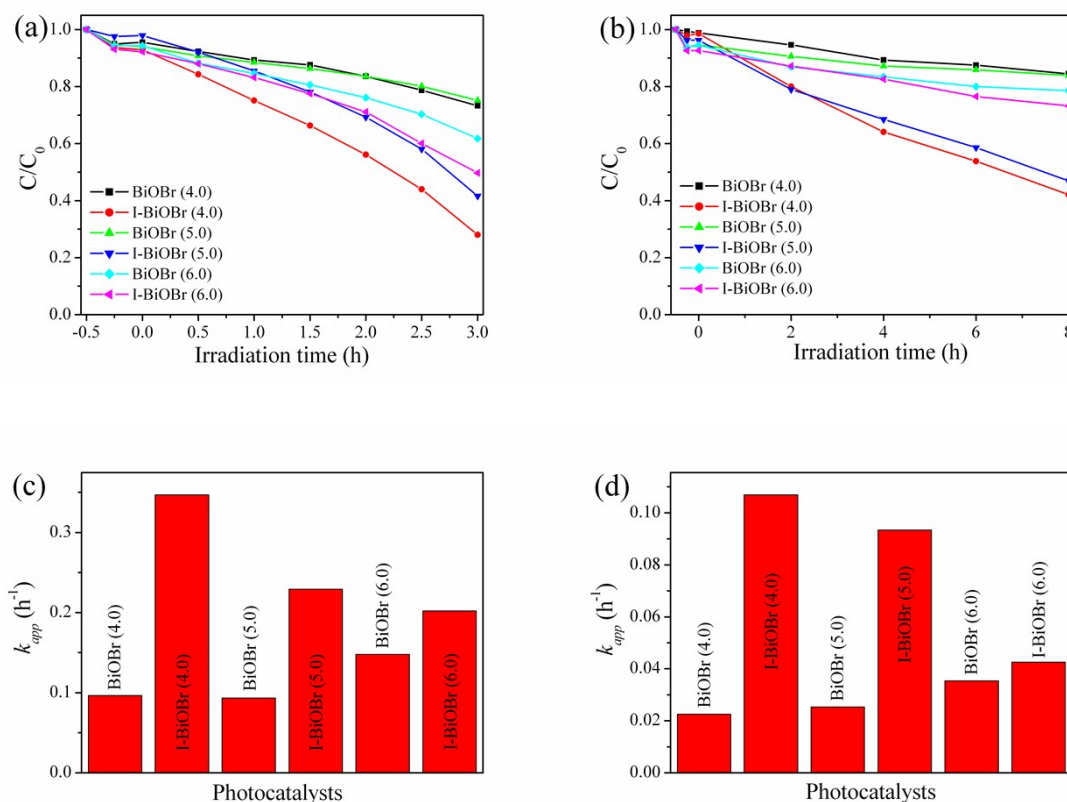

**Fig. S1.** Photocatalytic elimination of (a) MO and (b) phenol over different BiOBr and I-BiOBr samples prepared at different pH values (4.0-6.0) under visible light ( $\lambda > 400$  nm). Effects of synthesis pH values on the  $k_{app}$  values in the degradation process of (c) MO and (d) phenol.

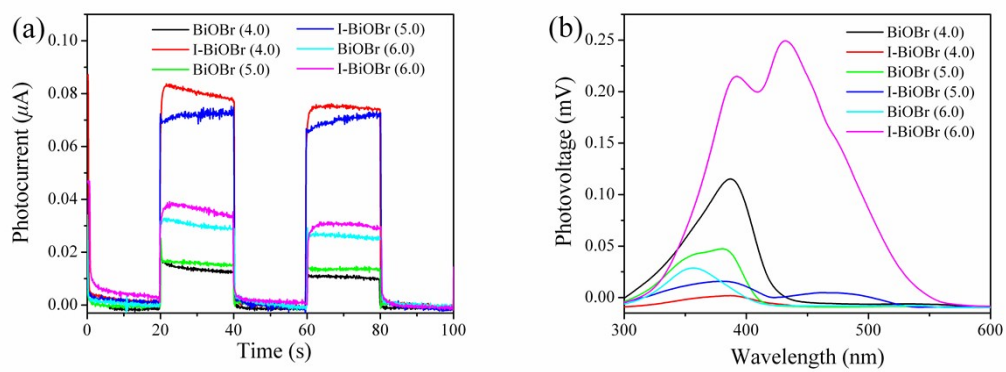

**Fig. S2.** (a) Transient photocurrent of the samples prepared at different pH values (4.0-6.0) under visible light ( $\lambda > 400$  nm) and (b) surface photovoltage properties.
